# Supplementary material
Source: PubMed Central journal article supplement (PMC4046801)
Supplement: nn4062726_si_001.pdf [file nn4062726_si_001.pdf]

## Supporting Information

### Design Considerations of Iron-Based Nanoclusters for Non-Invasive Tracking of Mesenchymal Stem Cell Homing

Xinglu Huang,<sup>†§</sup> Fan Zhang,<sup>†‡§</sup> Yu Wang,<sup>†</sup> Xiaolian Sun,<sup>†</sup> Ki Young Choi,<sup>†</sup> Dingbin Liu,<sup>†</sup> Jinsil Choi,<sup>¶</sup> Tae-Hyun Shin,<sup>¶</sup> Jinwoo Cheon,<sup>¶</sup> Gang Niu,<sup>†</sup> Xiaoyuan Chen<sup>†\*</sup>

<sup>†</sup>Laboratory of Molecular Imaging and Nanomedicine (LOMIN), National Institute of Biomedical Imaging and Bioengineering (NIBIB), National Institutes of Health (NIH), Bethesda, Maryland, 20892, USA

<sup>‡</sup>Center for Molecular Imaging and Translational Medicine, School of Public Health, Xiamen University (China)

<sup>¶</sup>Department of Chemistry, Yonsei University, Seoul, 120-749, Korea

\*Corresponding Author: e-mail; [Shawn.Chen@nih.gov](mailto:Shawn.Chen@nih.gov)

<sup>§</sup>These authors contributed equally to this work.

**RECEIVED DATE (to be automatically inserted after your manuscript is accepted if required according to the journal that you are submitting your paper to)**

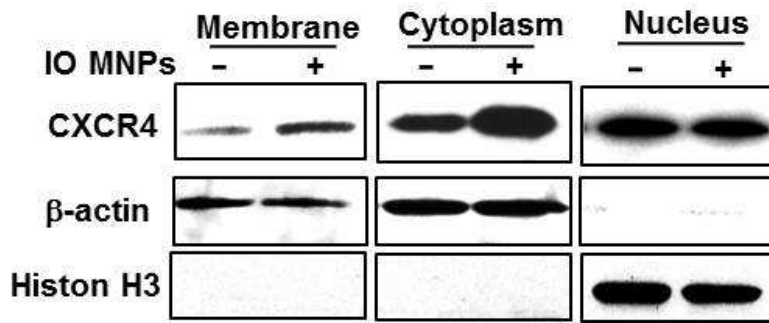

**Figure S1.** Western blot analysis of CXCR4 expression in different subcellular protein fractions after IO MNP treatment.

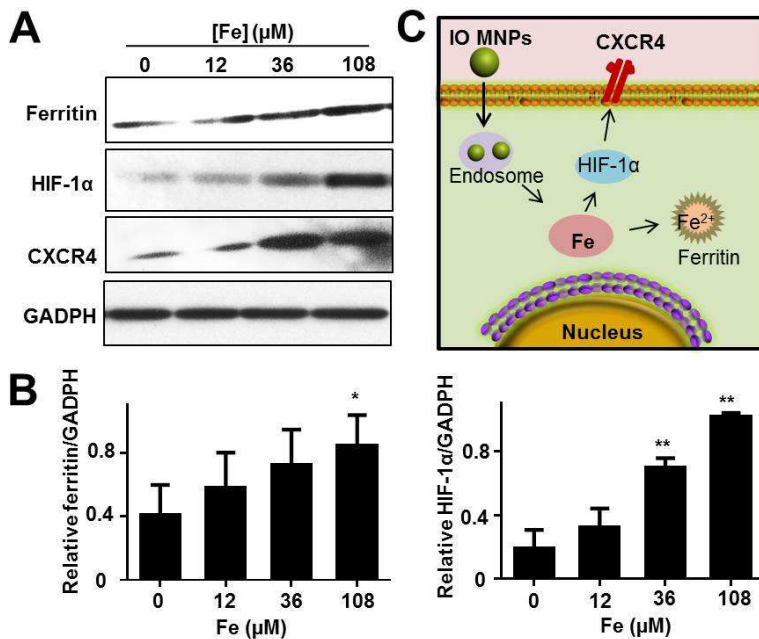

**Figure S2.** Potential mechanism of increased CXCR4 expression by iron-based MNPs treatment.

(A) Western blot analysis of the protein expression of CXCR4, HIF-1 $\alpha$  and ferritin after treatment with different iron concentrations. (B) Quantification analysis of CXCR4, HIF-1 $\alpha$  and ferritin expression (\* $p < 0.05$ , \*\* $p < 0.01$ ). (C) Schematic depiction of potential mechanism of

enhanced CXCR4 expression by IO MNPs. After uptake of IO MNPs, HIF-1 $\alpha$  expression of MSCs is increased by releasing iron ions, and further regulates CXCR4 expression.

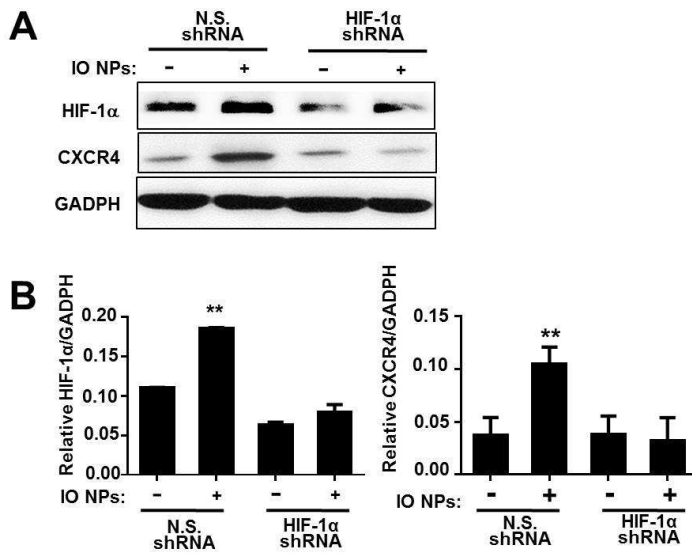

Figure S3. HIF-1 $\alpha$  mediated iron-based MNPs upregulated CXCR4 expression. (A) MSCs were transduced with lentivirus containing HIF-1 $\alpha$  shRNA, and then treated with IO MNPs. (B) HIF-1 $\alpha$  and CXCR4 expression levels were quantified by western blotting (\*\*p < 0.01).

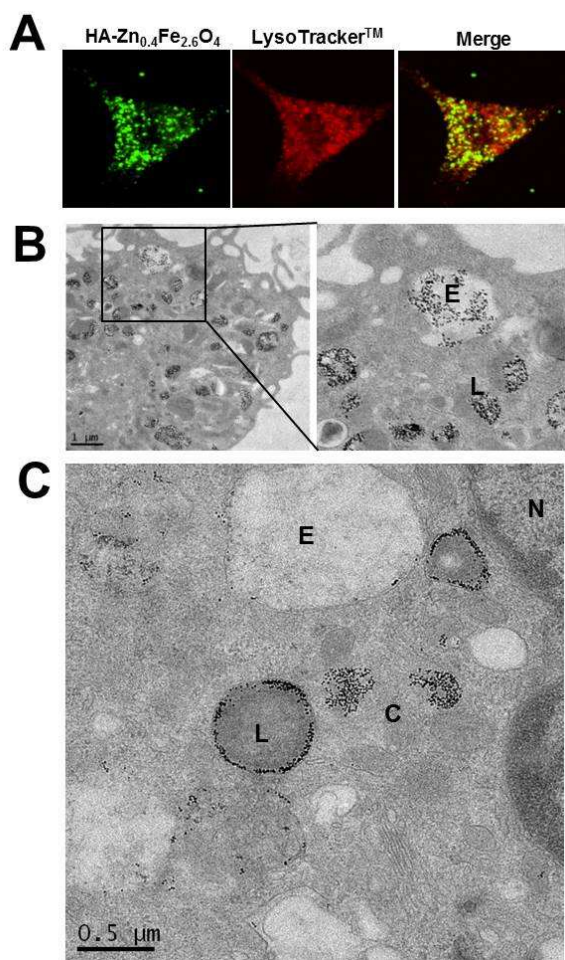

**Figure S4.** Intracellular localization of HA-Zn<sub>0.4</sub>Fe<sub>2.6</sub>O<sub>4</sub> NC. The MSCs were incubated with the NC for 2 h. (A, B) The NC intracellular distribution was illustrated by co-localization of the particles and endosome in confocal microscope (A) and TEM images (B). (C) The localization of HA-Zn<sub>0.4</sub>Fe<sub>2.6</sub>O<sub>4</sub> NC was also performed 24 h after labeling. TEM image illustrated that a portion of the particles escaped from the lysosome and released into the cytosol of MSCs. E: endosome; L: lysosome; C: cytoplasm; N: nucleus.

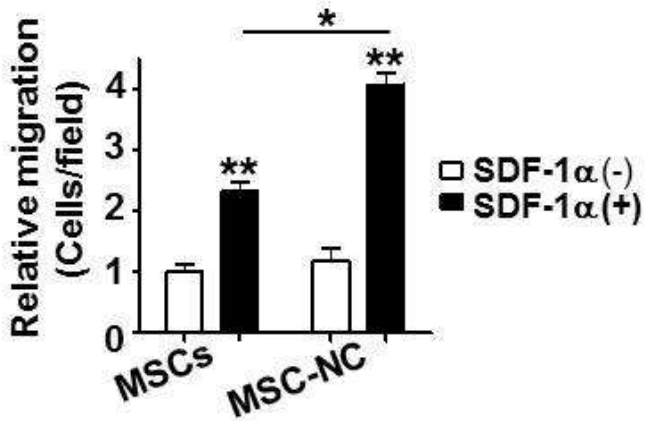

**Figure S5.** Migration capacity of MSCs untreated and treated with HA-Zn<sub>0.4</sub>Fe<sub>2.6</sub>O<sub>4</sub> NC in the presence and absence of SDF-1α. (\* p < 0.05, \*\* p < 0.01)

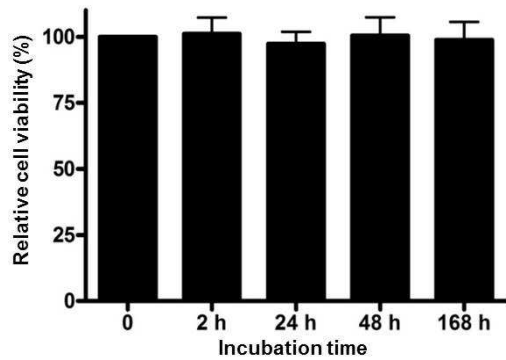

**Figure S6.** After treatment with 108 μM NC at different time points, *in vitro* cytotoxicity was investigated by standard MTT assay, showing no obvious change in cell proliferation after labeling.

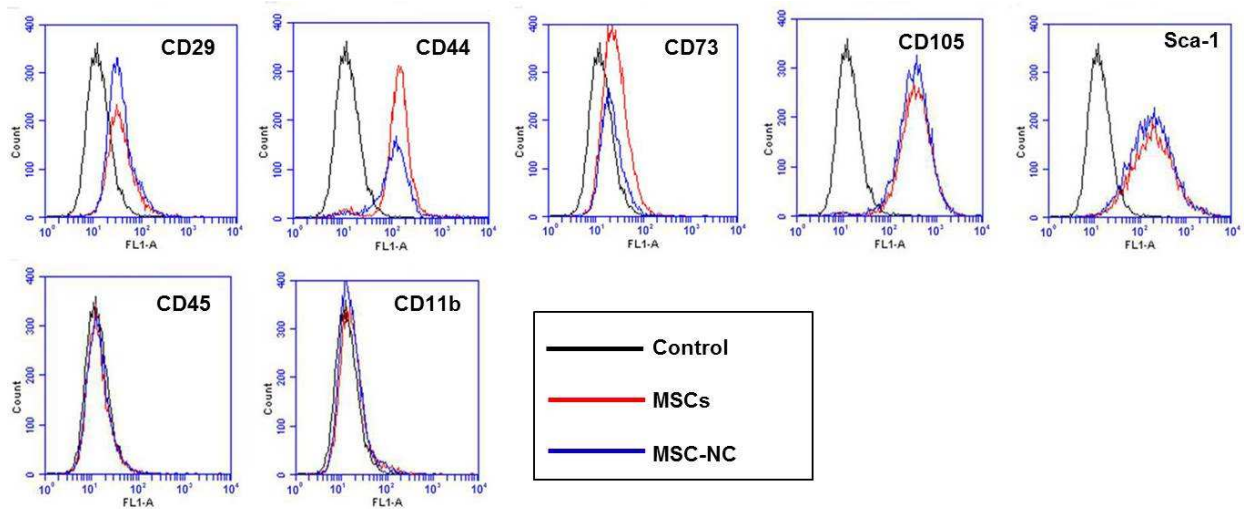

**Figure S7.** FACS analyses of the surface markers of unlabeled and labeled MSCs after 10 days treatment.

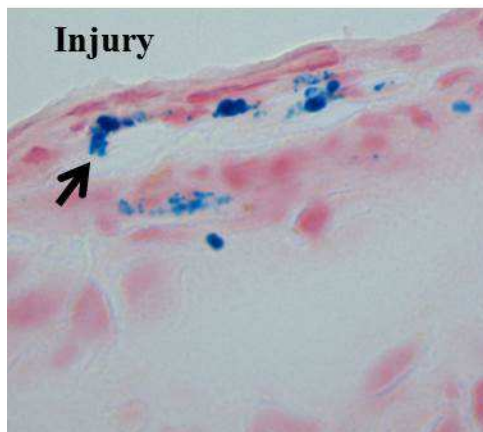

**Figure S8.** Prussian blue staining of targeted delivery of HA-Zn<sub>0.4</sub>Fe<sub>2.6</sub>O<sub>4</sub> NC-labeled MSCs to TBI (arrow). At 48 h post-injection, the mice were sacrificed and frozen tissue slices were prepared.

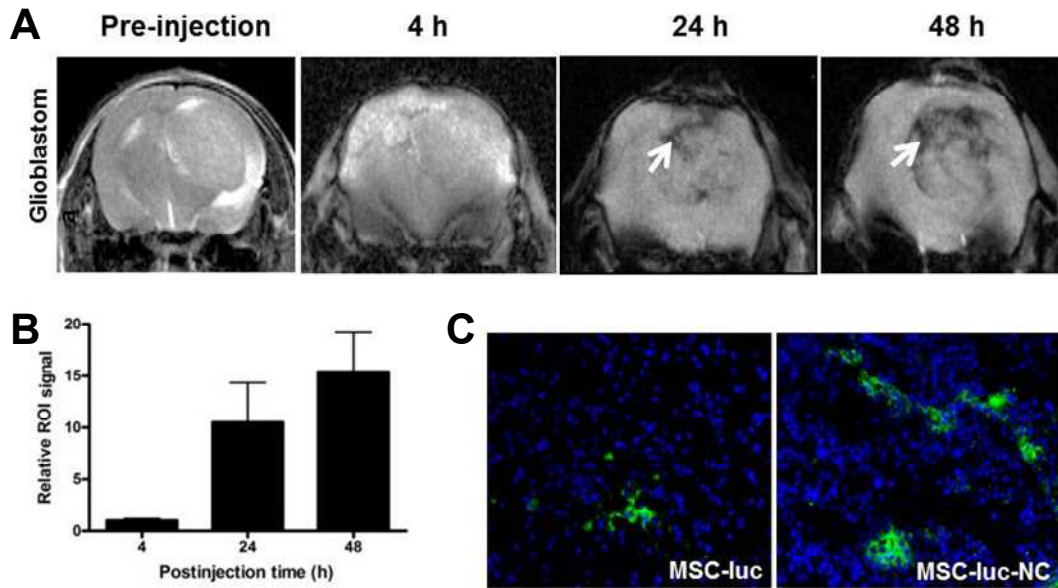

**Figure S9.** (A) MR images of targeted delivery of HA-Zn<sub>0.4</sub>Fe<sub>2.6</sub>O<sub>4</sub> NC-labeled MSCs to orthotopic U87MG tumor (arrow). (B) Region of interest (ROI) analysis the relative T<sub>2</sub> signal in the tumor region at different time points after NC-labeled MSCs injection. (C) Immunofluorescence staining of frozen tissue slices confirmed significantly more delivery of NC-labeled MSCs than unlabeled MSCs, both of which express firefly luciferase (fLuc).

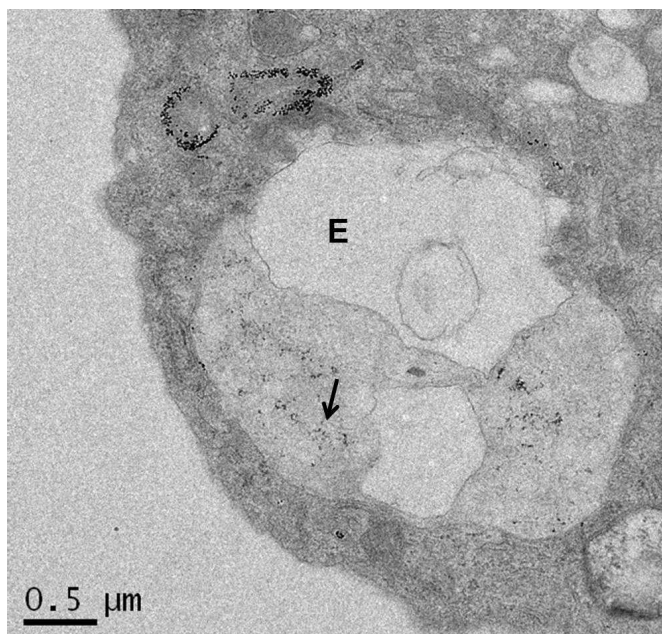

**Figure S10.** TEM image of NP localization in MSCs. The size of particles was changed from  $13 \pm 0.5$  nm to  $7.3 \pm 2.6$  nm (arrow), which demonstrated the particles were degraded by endosome after 24 h labeling E: endosome.
